# Supplementary material
Source: MDPI journal article supplement (https://www.mdpi.com/2071-1050/14/13/8130)
Supplement: s1 [file s1]

*Supplementary information of the article:*

## **Potential uses of artisanal gold mine tailings, with an emphasis on the role of centrifugal separation technique**

<sup>1</sup>Department of Materials Science and Engineering, African University of Science and Technology, Abuja PM B 681, Nigeria; [jmunganyinka@aust.edu.ng](mailto:jmunganyinka@aust.edu.ng); [hbaptiste@aust.edu.ng](mailto:hbaptiste@aust.edu.ng); [aderade2004@yahoo.com](mailto:aderade2004@yahoo.com);

<sup>2</sup>Mechanical Engineering, Worcester Polytechnic Institute, Worcester, MA 01609, Ma, USA; [bmishra@wpi.edu](mailto:bmishra@wpi.edu); [htanvar@wpi.edu](mailto:htanvar@wpi.edu)

<sup>3</sup>Shenzhen MSU-BIT University, Shenzhen 517182, China; [ndayiclaude2006@yahoo.fr](mailto:ndayiclaude2006@yahoo.fr)

<sup>4</sup>The Center for Earth and Natural Resource Sciences, Kigali, Rwanda

<sup>5</sup>Department of Materials Engineering, Indian Institute of Science, Bangalore, India; [leviemweene@alum.iisc.ac.in](mailto:leviemweene@alum.iisc.ac.in)

<sup>6</sup>Minerals Engineering, University of Mines and Technology, Tarkwa, Ghana; [gofori-sarpong@umat.edu.gh](mailto:gofori-sarpong@umat.edu.gh)

<sup>7</sup>Department of Metallurgical and Materials Engineering, Obafemi Awolowo University, Ile-Ife, Nigeria

\*Corresponding author: Jeanne Pauline Munganyinka; E-mail: [jmunganyinka@aust.edu.ng](mailto:jmunganyinka@aust.edu.ng); Tel. +250 791448030

### **This supplementary information contains:**

- Five pages
- One supplementary data
- One figure
- Eight references

## **Supplementary information on the Miyove gold mine**

### **Regional geology**

The Miyove gold mine (2,937 hectares) is located in the northern part of the Kibara intercontinental orogenic belt. The orogen stretches SSW to NNE for about 1500 km, from Katanga in the Democratic Republic of Congo, in the south, to southwestern Uganda, in the north. The width of the belt reaches 500 km at its widest, west of Lake Victoria. The orogen has a long and complex evolution, from the Mesoproterozoic through to the Neoproterozoic. It formed part of a series of long-lived Mesoproterozoic intracratonic sedimentary shallow water basins (aulacogens), which had been developed on the Palaeoproterozoic (Archaean) basement between the Congo and Tanzania cratons. It is dominated by folded and metamorphosed sediment, mainly schist and sandstone (quartzite), with minor shale, carbonates, volcanics, and conglomerates [1–5].

### **Local geology**

The gold mine is located within the axial part and the eastern limb of the narrow Miyove synclinorium, which strikes NNW for more than 50 km with a limb width of about 11 km [6]. It is composed of at least three main lithological units, with the dominance of sandstone, siltstone, and claystone. The rocks are often altered into quartzite, phyllite, and shale. The rock sequence is folded into narrow symmetrical synclines and anticlines striking NW with limb amplitudes of 200–400 m and 30 to 60° dip angles [7]. Two systems of faults controlling gold mineralisation in the Miyove area are recognized. For example, the Baredaga and Masogwe occurrences are located along the NW striking main shear zone, composed of a system of sub-parallel en-échelon faults and fissure zones. These faults coincide with the direction of the fold axes, which may indicate that NW faults were formed syngenetically with the folds. The secondary N–S system of faults was recognized by alteration patterns such as silicification and haematite oxidation and the N–S orientation of some artisanal mines. Often, mineralization is controlled by the intersection of NW and N-S faults [6,7].

## Artisanal gold mining

Since beginning of the 20<sup>th</sup> century the Miyove area has been explored by artisanal miners who work as private individuals and cooperatively [8]. Artisanal pits are usually shallow, not more than 5 to 7 m in depth. However, in some areas the miners use underground galleries to follow rich gold mineralization (Supplementary Figure S1).

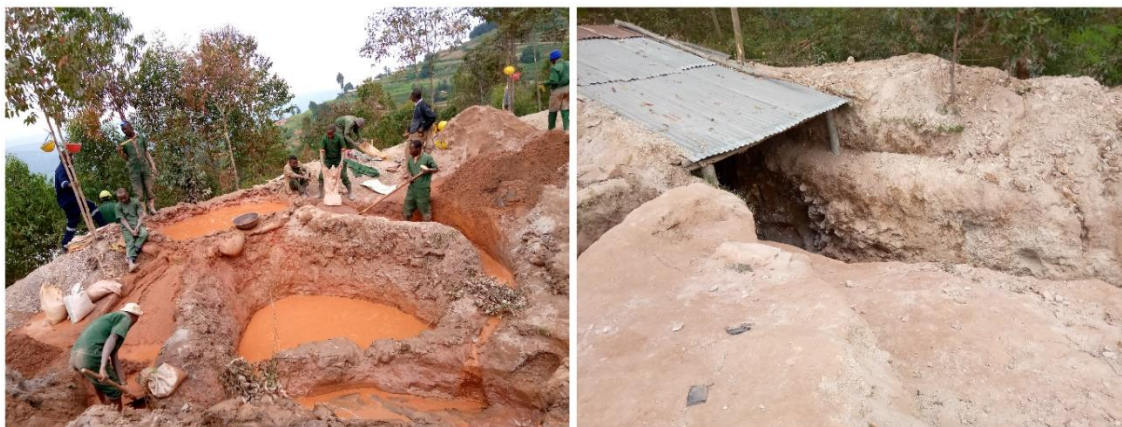

**Supplementary Figure S1.** Photos showing local gold processing method during sampling (left) and pits excavated by artisanal miners (right).

## Reference A.

1. Theunissen, K.; Hanon, M.; Fernandez, M. Carte Géologique Du Rwanda Au 1/250.000. *Musée R. l'Afrique Cent. Tervuren, Belgique* **1991**.
2. Fernandez-Alonso, M.; Cutten, H.; De Waele, B.; Tack, L.; Tahon, A.; Baudet, D.; Barritt, S.D. *The Mesoproterozoic Karagwe-Ankole Belt (Formerly the NE Kibara Belt): The Result of Prolonged Extensional Intracratonic Basin Development Punctuated by Two Short-Lived Far-Field Compressional Events*; Elsevier B.V., 2012; Vol. 216–219;.
3. Baudet, D.; Hanon, M.; Lemonne, E.; Theunissen, K.; Buyagu, S.; Dehandschutter, J.; Ngizimana, W.; Nsengiyumva, P.; Rusanganwa, J.B.; Tahon, A. Lithostratigraphie Du Domaine Sédimentaire de La Chaîne Kibarienne Au Rwanda. *Ann. la Société géologique Belgique* **1989**.
4. Uwiduhaye, J. d'Amour; Ngaruye, J.C.; Saibi, H. Defining Potential Mineral Exploration Targets from the Interpretation of Aeromagnetic Data in Western Rwanda. *Ore Geol. Rev.* **2021**, 128, 103927.
5. Cahen, L.; Snelling, N.J.; Delhal, J.; Vail, J.R.; Bonhomme, M.; Ledent, D. The Geochronology and Evolution of Africa 1984.
6. Baudin, B.; Zigirababili, J.; Ziserman, A.; Petricec, V. Carte Des Gîtes Minéraux Du Rwanda Ministère Des Ressources Naturelles (MIRENA). *République Rwandaise* **1982**.
7. SRK Exploration Services *An Independent Technical Review of the Miyove Gold Project, Rwanda*; 2014;
8. Wouters, S.; Hulsbosch, N.; Kaskes, P.; Claeys, P.; Dewaele, S.; Melcher, F.; Onuk, P.; Muchez, P. Late Orogenic Gold Mineralization in the Western Domain of the Karagwe-Ankole Belt (Central Africa): Auriferous Quartz Veins from the Byumba Deposit (Rwanda). *Ore Geol. Rev.* **2020**, 125, 103666, doi:10.1016/j.oregeorev.2020.103666.
